# Supplementary material for: Lack of TLR4 modifies the miRNAs profile and attenuates inflammatory signaling pathways
Source: PubMed Central journal article supplement (PMC7418977; doi:10.1371/journal.pone.0237066), 2020-08-11
Supplement: pone.0237066.s001.pdf [file pone.0237066.s001.pdf]

**Supplementary Table 1S:** List of miRNAs counts for each condition studied.

| miRNA               | WT1 | WT2 | WT3 | KO2 | KO3 |
|---------------------|-----|-----|-----|-----|-----|
| mmu-miR-1982-3p     | 0   | 0   | 0   | 2   | 2   |
| mmu-miR-5122        | 0   | 0   | 0   | 2   | 2   |
| mmu-miR-5114        | 0   | 0   | 0   | 2   | 3   |
| mmu-miR-677-3p      | 0   | 0   | 0   | 3   | 2   |
| mmu-let-7c-1-3p     | 0   | 2   | 2   | 0   | 0   |
| mmu-miR-135b-5p     | 0   | 2   | 2   | 0   | 0   |
| mmu-miR-218-2-3p    | 2   | 2   | 0   | 0   | 0   |
| mmu-miR-296-3p      | 2   | 0   | 2   | 0   | 0   |
| mmu-miR-322-3p      | 2   | 2   | 0   | 0   | 0   |
| mmu-miR-7019-3p     | 2   | 2   | 0   | 0   | 0   |
| mmu-miR-7066-3p     | 2   | 0   | 2   | 0   | 0   |
| mmu-miR-140-5p      | 2   | 0   | 2   | 0   | 2   |
| mmu-miR-144-5p      | 2   | 3   | 0   | 0   | 0   |
| mmu-miR-187-5p      | 3   | 2   | 0   | 0   | 0   |
| mmu-miR-1947-5p     | 3   | 2   | 0   | 0   | 0   |
| mmu-miR-222-5p      | 3   | 2   | 0   | 0   | 0   |
| mmu-miR-299a-3p     | 2   | 3   | 0   | 0   | 0   |
| mmu-miR-30d-3p      | 0   | 2   | 3   | 0   | 0   |
| mmu-miR-376c-3p     | 3   | 0   | 2   | 0   | 0   |
| mmu-miR-669a-3p     | 0   | 2   | 3   | 0   | 0   |
| mmu-miR-153-5p      | 0   | 2   | 3   | 0   | 2   |
| mmu-miR-25-5p       | 0   | 3   | 2   | 2   | 0   |
| mmu-miR-92b-5p      | 0   | 3   | 2   | 3   | 0   |
| mmu-miR-6240        | 0   | 3   | 2   | 6   | 0   |
| mmu-miR-677-5p      | 2   | 3   | 0   | 4   | 3   |
| mmu-let-7a-1-3p     | 2   | 2   | 2   | 0   | 0   |
| mmu-miR-376a-3p     | 2   | 2   | 2   | 0   | 0   |
| mmu-miR-486a-3p     | 4   | 2   | 0   | 0   | 0   |
| mmu-miR-539-5p      | 0   | 4   | 2   | 0   | 0   |
| mmu-miR-20a-5p      | 3   | 0   | 3   | 0   | 2   |
| mmu-miR-3061-5p     | 4   | 2   | 0   | 2   | 0   |
| mmu-miR-7015-3p     | 3   | 0   | 3   | 2   | 0   |
| mmu-miR-137-5p      | 2   | 2   | 2   | 4   | 0   |
| mmu-miR-1943-5p     | 3   | 3   | 0   | 5   | 0   |
| mmu-miR-210-5p      | 0   | 4   | 2   | 0   | 5   |
| mmu-let-7g-3p       | 0   | 5   | 2   | 0   | 0   |
| mmu-miR-191-3p      | 0   | 4   | 3   | 0   | 0   |
| mmu-miR-195a-3p     | 0   | 5   | 2   | 0   | 0   |
| mmu-miR-204-3p      | 2   | 0   | 5   | 0   | 0   |
| mmu-miR-3084-3p     | 3   | 2   | 2   | 0   | 0   |
| mmu-miR-3102-3p.2-3 | 2   | 5   | 0   | 0   | 0   |
| mmu-miR-679-5p      | 4   | 3   | 0   | 0   | 0   |
| mmu-miR-7068-3p     | 4   | 3   | 0   | 0   | 0   |
| mmu-miR-12191-3p    | 3   | 2   | 2   | 0   | 2   |
| mmu-miR-29a-5p      | 2   | 3   | 2   | 2   | 0   |
| mmu-miR-764-5p      | 0   | 4   | 3   | 3   | 0   |
| mmu-miR-183-3p      | 2   | 4   | 2   | 0   | 0   |
| mmu-miR-211-5p      | 0   | 6   | 2   | 0   | 0   |

|                     |   |    |   |   |   |
|---------------------|---|----|---|---|---|
| mmu-miR-3083b-3p    | 2 | 3  | 3 | 0 | 0 |
| mmu-miR-3102-5p.2-5 | 3 | 2  | 3 | 0 | 0 |
| mmu-miR-344d-3-5p   | 2 | 4  | 2 | 0 | 0 |
| mmu-miR-374b-5p     | 2 | 6  | 0 | 0 | 0 |
| mmu-miR-665-3p      | 3 | 0  | 5 | 0 | 0 |
| mmu-miR-7068-5p     | 3 | 5  | 0 | 0 | 0 |
| mmu-miR-325-5p      | 2 | 4  | 2 | 2 | 0 |
| mmu-miR-7046-3p     | 3 | 3  | 2 | 2 | 0 |
| mmu-miR-99a-3p      | 0 | 5  | 3 | 3 | 0 |
| mmu-miR-1247-5p     | 2 | 4  | 2 | 3 | 4 |
| mmu-miR-1964-3p     | 3 | 2  | 3 | 5 | 3 |
| mmu-miR-412-5p      | 2 | 3  | 3 | 7 | 7 |
| mmu-miR-3061-3p     | 4 | 2  | 3 | 0 | 0 |
| mmu-miR-3083-5p     | 4 | 3  | 2 | 0 | 0 |
| mmu-miR-6516-5p     | 6 | 3  | 0 | 0 | 0 |
| mmu-miR-879-5p      | 5 | 2  | 2 | 2 | 0 |
| mmu-miR-145a-3p     | 4 | 3  | 3 | 0 | 0 |
| mmu-miR-19b-3p      | 3 | 4  | 3 | 0 | 0 |
| mmu-miR-7226-3p     | 4 | 6  | 0 | 0 | 0 |
| mmu-miR-412-3p      | 4 | 4  | 2 | 0 | 2 |
| mmu-miR-29b-2-5p    | 4 | 2  | 4 | 5 | 0 |
| mmu-miR-93-3p       | 0 | 10 | 0 | 2 | 3 |
| mmu-miR-1264-3p     | 4 | 4  | 3 | 0 | 0 |
| mmu-miR-671-5p      | 5 | 0  | 6 | 0 | 0 |
| mmu-miR-3082-3p     | 4 | 4  | 3 | 2 | 0 |
| mmu-miR-7224-3p     | 0 | 5  | 6 | 2 | 2 |
| mmu-miR-3057-5p     | 2 | 5  | 4 | 8 | 0 |
| mmu-miR-134-3p      | 0 | 7  | 4 | 4 | 6 |
| mmu-miR-350-3p      | 0 | 7  | 5 | 0 | 0 |
| mmu-miR-1306-5p     | 4 | 4  | 4 | 3 | 0 |
| mmu-miR-34c-3p      | 4 | 3  | 5 | 3 | 0 |
| mmu-miR-669c-5p     | 6 | 2  | 4 | 2 | 2 |
| mmu-miR-138-2-3p    | 6 | 4  | 2 | 5 | 2 |
| mmu-miR-345-3p      | 2 | 7  | 4 | 0 | 0 |
| mmu-miR-148b-5p     | 5 | 5  | 3 | 0 | 2 |
| mmu-miR-5129-3p     | 5 | 4  | 4 | 6 | 0 |
| mmu-miR-500-3p      | 3 | 5  | 5 | 4 | 3 |
| mmu-miR-199a-3p     | 5 | 6  | 3 | 0 | 0 |
| mmu-miR-96-5p       | 3 | 4  | 7 | 0 | 0 |
| mmu-miR-7b-5p       | 4 | 7  | 3 | 2 | 0 |
| mmu-miR-218-1-3p    | 4 | 4  | 6 | 8 | 3 |
| mmu-miR-3086-5p     | 5 | 5  | 5 | 2 | 0 |
| mmu-miR-1983        | 7 | 2  | 6 | 2 | 2 |
| mmu-miR-543-5p      | 3 | 4  | 8 | 4 | 0 |
| mmu-miR-323-5p      | 5 | 4  | 6 | 2 | 3 |
| mmu-miR-540-5p      | 4 | 6  | 5 | 2 | 3 |
| mmu-miR-17-5p       | 4 | 11 | 0 | 6 | 3 |
| mmu-miR-199b-3p     | 4 | 5  | 7 | 2 | 0 |
| mmu-miR-99b-3p      | 8 | 3  | 5 | 2 | 2 |
| mmu-miR-34b-3p      | 5 | 7  | 4 | 3 | 2 |

|                  |    |    |    |    |    |
|------------------|----|----|----|----|----|
| mmu-miR-28a-3p   | 2  | 8  | 6  | 4  | 3  |
| mmu-miR-3547-3p  | 2  | 9  | 5  | 5  | 3  |
| mmu-miR-764-3p   | 7  | 5  | 5  | 3  | 0  |
| mmu-miR-29c-5p   | 7  | 6  | 4  | 5  | 0  |
| mmu-miR-322-5p   | 5  | 7  | 5  | 2  | 3  |
| mmu-miR-342-5p   | 8  | 5  | 4  | 4  | 4  |
| mmu-miR-8114     | 5  | 7  | 5  | 10 | 8  |
| mmu-miR-27b-5p   | 3  | 10 | 5  | 0  | 0  |
| mmu-miR-200a-5p  | 4  | 9  | 5  | 3  | 0  |
| mmu-miR-504-5p   | 7  | 6  | 5  | 3  | 0  |
| mmu-miR-130b-3p  | 7  | 3  | 8  | 4  | 0  |
| mmu-miR-325-3p   | 5  | 7  | 6  | 4  | 0  |
| mmu-miR-344b-3p  | 7  | 5  | 6  | 0  | 4  |
| mmu-miR-551b-3p  | 2  | 10 | 6  | 5  | 0  |
| mmu-miR-377-3p   | 7  | 9  | 3  | 0  | 0  |
| mmu-miR-382-3p   | 6  | 2  | 11 | 0  | 0  |
| mmu-miR-350-5p   | 9  | 8  | 2  | 2  | 3  |
| mmu-miR-139-3p   | 9  | 6  | 4  | 3  | 6  |
| mmu-miR-3072-3p  | 5  | 5  | 9  | 3  | 6  |
| mmu-miR-30c-1-3p | 10 | 7  | 3  | 8  | 3  |
| mmu-let-7b-3p    | 8  | 9  | 4  | 0  | 2  |
| mmu-miR-135a-5p  | 5  | 10 | 6  | 4  | 0  |
| mmu-miR-7689-3p  | 6  | 6  | 9  | 4  | 2  |
| mmu-miR-384-3p   | 6  | 11 | 5  | 2  | 0  |
| mmu-miR-3085-3p  | 5  | 8  | 9  | 3  | 4  |
| mmu-miR-339-3p   | 8  | 10 | 4  | 2  | 5  |
| mmu-miR-200b-5p  | 3  | 12 | 8  | 2  | 0  |
| mmu-miR-148a-5p  | 7  | 11 | 5  | 2  | 5  |
| mmu-miR-409-5p   | 9  | 11 | 3  | 6  | 6  |
| mmu-miR-582-5p   | 7  | 9  | 8  | 3  | 2  |
| mmu-miR-700-3p   | 3  | 13 | 8  | 4  | 2  |
| mmu-miR-1843a-3p | 5  | 9  | 10 | 6  | 2  |
| mmu-miR-125a-3p  | 10 | 7  | 7  | 8  | 5  |
| mmu-miR-3552     | 5  | 11 | 9  | 6  | 6  |
| mmu-miR-592-5p   | 7  | 10 | 9  | 0  | 0  |
| mmu-miR-106b-5p  | 8  | 8  | 10 | 3  | 2  |
| mmu-miR-3475-3p  | 9  | 9  | 8  | 4  | 3  |
| mmu-miR-299a-5p  | 9  | 9  | 8  | 5  | 3  |
| mmu-miR-3093-5p  | 8  | 12 | 6  | 7  | 3  |
| mmu-miR-672-5p   | 9  | 11 | 6  | 6  | 4  |
| mmu-miR-7047-3p  | 10 | 6  | 10 | 6  | 4  |
| mmu-miR-378c     | 10 | 10 | 6  | 8  | 4  |
| mmu-miR-702-3p   | 9  | 10 | 7  | 13 | 5  |
| mmu-miR-6540-5p  | 4  | 13 | 10 | 6  | 4  |
| mmu-miR-7a-2-3p  | 7  | 12 | 8  | 2  | 8  |
| mmu-let-7i-3p    | 6  | 16 | 5  | 8  | 6  |
| mmu-miR-760-3p   | 13 | 9  | 5  | 7  | 14 |
| mmu-miR-376b-3p  | 6  | 15 | 7  | 2  | 0  |
| mmu-miR-7a-5p    | 9  | 9  | 10 | 4  | 6  |
| mmu-miR-3078-5p  | 8  | 15 | 5  | 8  | 5  |

|                  |    |    |    |    |    |
|------------------|----|----|----|----|----|
| mmu-miR-7080-3p  | 4  | 19 | 5  | 6  | 9  |
| mmu-miR-7a-1-3p  | 5  | 10 | 14 | 0  | 0  |
| mmu-miR-130b-5p  | 6  | 14 | 9  | 4  | 0  |
| mmu-miR-877-5p   | 6  | 11 | 12 | 7  | 5  |
| mmu-miR-877-3p   | 8  | 14 | 7  | 15 | 11 |
| mmu-miR-210-3p   | 17 | 5  | 8  | 5  | 2  |
| mmu-miR-128-2-5p | 10 | 10 | 10 | 6  | 9  |
| mmu-miR-455-3p   | 5  | 22 | 3  | 15 | 10 |
| mmu-miR-433-5p   | 7  | 15 | 9  | 5  | 4  |
| mmu-miR-378a-5p  | 9  | 12 | 10 | 6  | 5  |
| mmu-miR-744-3p   | 14 | 8  | 10 | 6  | 2  |
| mmu-miR-770-5p   | 11 | 11 | 10 | 11 | 3  |
| mmu-miR-22-5p    | 13 | 7  | 13 | 2  | 2  |
| mmu-let-7j       | 16 | 6  | 11 | 6  | 0  |
| mmu-miR-203-3p   | 13 | 8  | 13 | 2  | 2  |
| mmu-miR-574-3p   | 11 | 16 | 8  | 8  | 6  |
| mmu-miR-137-3p   | 15 | 12 | 9  | 0  | 6  |
| mmu-miR-340-3p   | 11 | 15 | 10 | 7  | 2  |
| mmu-miR-376a-5p  | 10 | 14 | 13 | 2  | 2  |
| mmu-miR-28a-5p   | 10 | 17 | 10 | 2  | 3  |
| mmu-miR-488-5p   | 11 | 12 | 14 | 4  | 7  |
| mmu-miR-1839-3p  | 6  | 22 | 10 | 2  | 3  |
| mmu-miR-184-3p   | 14 | 14 | 10 | 5  | 2  |
| mmu-miR-425-3p   | 11 | 19 | 8  | 6  | 8  |
| mmu-miR-301a-3p  | 3  | 16 | 20 | 6  | 3  |
| mmu-miR-296-5p   | 9  | 18 | 13 | 8  | 9  |
| mmu-miR-138-1-3p | 10 | 16 | 15 | 10 | 5  |
| mmu-miR-3068-3p  | 11 | 15 | 17 | 5  | 5  |
| mmu-miR-15b-5p   | 15 | 18 | 10 | 8  | 9  |
| mmu-miR-324-3p   | 17 | 9  | 19 | 9  | 4  |
| mmu-miR-153-3p   | 9  | 13 | 24 | 7  | 8  |
| mmu-miR-185-5p   | 18 | 17 | 11 | 7  | 8  |
| mmu-miR-1198-5p  | 18 | 18 | 10 | 11 | 7  |
| mmu-miR-124-5p   | 13 | 17 | 16 | 8  | 10 |
| mmu-miR-194-5p   | 13 | 21 | 13 | 4  | 7  |
| mmu-miR-700-5p   | 12 | 16 | 21 | 9  | 5  |
| mmu-miR-488-3p   | 14 | 9  | 29 | 4  | 2  |
| mmu-miR-874-5p   | 11 | 19 | 23 | 6  | 6  |
| mmu-miR-29b-3p   | 14 | 21 | 18 | 5  | 8  |
| mmu-miR-365-3p   | 15 | 19 | 19 | 10 | 4  |
| mmu-miR-501-3p   | 17 | 20 | 16 | 14 | 7  |
| mmu-miR-134-5p   | 18 | 16 | 19 | 14 | 8  |
| mmu-miR-3099-3p  | 13 | 32 | 9  | 12 | 6  |
| mmu-miR-674-5p   | 24 | 13 | 18 | 9  | 7  |
| mmu-let-7e-3p    | 16 | 20 | 20 | 12 | 4  |
| mmu-miR-1981-3p  | 21 | 24 | 11 | 16 | 9  |
| mmu-miR-377-5p   | 23 | 14 | 19 | 22 | 10 |
| mmu-miR-770-3p   | 21 | 19 | 17 | 20 | 9  |
| mmu-miR-1981-5p  | 17 | 25 | 15 | 22 | 11 |
| mmu-miR-676-5p   | 22 | 22 | 16 | 8  | 5  |

|                   |    |    |    |    |    |
|-------------------|----|----|----|----|----|
| mmu-miR-532-3p    | 17 | 25 | 18 | 15 | 13 |
| mmu-miR-1224-5p   | 20 | 23 | 17 | 19 | 18 |
| mmu-miR-872-5p    | 17 | 18 | 26 | 2  | 2  |
| mmu-miR-339-5p    | 18 | 24 | 19 | 18 | 10 |
| mmu-miR-24-2-5p   | 27 | 14 | 22 | 9  | 7  |
| mmu-miR-369-3p    | 17 | 22 | 25 | 6  | 3  |
| mmu-miR-106b-3p   | 21 | 24 | 20 | 6  | 8  |
| mmu-miR-329-3p    | 22 | 25 | 18 | 11 | 8  |
| mmu-miR-34a-5p    | 38 | 11 | 16 | 10 | 13 |
| mmu-miR-345-5p    | 18 | 32 | 19 | 9  | 3  |
| mmu-miR-664-5p    | 20 | 26 | 24 | 25 | 17 |
| mmu-miR-379-3p    | 17 | 26 | 28 | 3  | 3  |
| mmu-miR-30c-2-3p  | 31 | 19 | 24 | 16 | 10 |
| mmu-miR-346-5p    | 27 | 23 | 28 | 24 | 16 |
| mmu-miR-221-5p    | 21 | 27 | 31 | 9  | 8  |
| mmu-miR-329-5p    | 33 | 24 | 25 | 17 | 7  |
| mmu-miR-652-3p    | 28 | 32 | 22 | 23 | 5  |
| mmu-miR-496a-3p   | 25 | 28 | 30 | 4  | 3  |
| mmu-miR-344-3p    | 33 | 26 | 24 | 14 | 9  |
| mmu-miR-935       | 19 | 39 | 27 | 27 | 19 |
| mmu-miR-148b-3p   | 21 | 32 | 33 | 9  | 2  |
| mmu-miR-15a-5p    | 30 | 28 | 32 | 7  | 11 |
| mmu-miR-376b-5p   | 29 | 31 | 30 | 5  | 13 |
| mmu-miR-154-5p    | 34 | 28 | 30 | 16 | 11 |
| mmu-miR-379-5p    | 28 | 32 | 33 | 12 | 6  |
| mmu-miR-324-5p    | 32 | 32 | 32 | 24 | 14 |
| mmu-miR-673-3p    | 34 | 29 | 33 | 21 | 19 |
| mmu-miR-6944-3p   | 15 | 55 | 26 | 31 | 30 |
| mmu-miR-146b-5p   | 50 | 17 | 32 | 9  | 7  |
| mmu-miR-146a-5p   | 32 | 34 | 33 | 9  | 8  |
| mmu-miR-421-3p    | 36 | 41 | 24 | 16 | 7  |
| mmu-miR-125b-1-3p | 27 | 46 | 28 | 20 | 23 |
| mmu-miR-708-5p    | 32 | 38 | 32 | 15 | 13 |
| mmu-miR-370-5p    | 46 | 25 | 31 | 17 | 12 |
| mmu-miR-384-5p    | 36 | 44 | 27 | 13 | 9  |
| mmu-miR-335-5p    | 31 | 42 | 35 | 7  | 2  |
| mmu-miR-873a-3p   | 33 | 39 | 36 | 24 | 17 |
| mmu-miR-495-3p    | 34 | 31 | 46 | 6  | 11 |
| mmu-miR-195a-5p   | 44 | 36 | 31 | 12 | 8  |
| mmu-miR-540-3p    | 52 | 28 | 31 | 25 | 19 |
| mmu-miR-666-3p    | 36 | 43 | 34 | 30 | 11 |
| mmu-miR-598-3p    | 36 | 33 | 45 | 12 | 7  |
| mmu-miR-200c-3p   | 17 | 60 | 41 | 5  | 0  |
| mmu-miR-142a-5p   | 40 | 45 | 33 | 7  | 10 |
| mmu-miR-10a-5p    | 35 | 57 | 26 | 18 | 15 |
| mmu-miR-3059-5p   | 42 | 51 | 26 | 18 | 16 |
| mmu-miR-673-5p    | 44 | 40 | 35 | 41 | 16 |
| mmu-miR-497a-5p   | 35 | 49 | 36 | 25 | 10 |
| mmu-miR-101b-3p   | 35 | 37 | 51 | 6  | 13 |
| mmu-miR-431-5p    | 39 | 47 | 38 | 24 | 9  |

|                   |    |     |    |    |    |
|-------------------|----|-----|----|----|----|
| mmu-miR-338-5p    | 40 | 44  | 41 | 13 | 11 |
| mmu-miR-133a-3p   | 39 | 47  | 46 | 26 | 22 |
| mmu-miR-666-5p    | 28 | 61  | 45 | 34 | 25 |
| mmu-miR-34c-5p    | 63 | 33  | 39 | 19 | 24 |
| mmu-miR-9-3p      | 45 | 59  | 32 | 11 | 13 |
| mmu-miR-758-3p    | 30 | 62  | 45 | 21 | 25 |
| mmu-miR-3102-3p   | 42 | 55  | 40 | 42 | 13 |
| mmu-miR-375-3p    | 44 | 54  | 40 | 17 | 6  |
| mmu-miR-136-5p    | 49 | 47  | 42 | 15 | 16 |
| mmu-miR-874-3p    | 52 | 46  | 40 | 37 | 25 |
| mmu-miR-708-3p    | 54 | 50  | 36 | 11 | 10 |
| mmu-miR-98-5p     | 51 | 42  | 48 | 22 | 19 |
| mmu-miR-1839-5p   | 55 | 45  | 42 | 18 | 14 |
| mmu-miR-380-3p    | 42 | 54  | 52 | 24 | 10 |
| mmu-miR-543-3p    | 62 | 43  | 45 | 21 | 19 |
| mmu-miR-490-3p    | 46 | 63  | 42 | 33 | 19 |
| mmu-miR-873a-5p   | 51 | 46  | 56 | 21 | 22 |
| mmu-miR-130a-3p   | 45 | 59  | 50 | 12 | 12 |
| mmu-miR-31-5p     | 64 | 38  | 56 | 40 | 27 |
| mmu-miR-1298-5p   | 43 | 51  | 65 | 21 | 22 |
| mmu-miR-674-3p    | 52 | 58  | 52 | 38 | 37 |
| mmu-miR-423-5p    | 64 | 53  | 45 | 53 | 39 |
| mmu-miR-323-3p    | 51 | 72  | 43 | 28 | 18 |
| mmu-miR-411-3p    | 56 | 53  | 60 | 16 | 18 |
| mmu-miR-27a-3p    | 62 | 55  | 54 | 22 | 21 |
| mmu-miR-1298-3p   | 43 | 75  | 55 | 18 | 7  |
| mmu-miR-141-3p    | 20 | 99  | 56 | 2  | 0  |
| mmu-miR-193b-3p   | 47 | 62  | 68 | 49 | 31 |
| mmu-miR-29c-3p    | 48 | 84  | 53 | 10 | 14 |
| mmu-miR-382-5p    | 60 | 66  | 59 | 31 | 16 |
| mmu-miR-344d-3p   | 55 | 71  | 60 | 37 | 29 |
| mmu-miR-10b-5p    | 81 | 54  | 53 | 7  | 15 |
| mmu-miR-181a-2-3p | 65 | 77  | 47 | 42 | 39 |
| mmu-miR-187-3p    | 39 | 85  | 67 | 21 | 11 |
| mmu-miR-370-3p    | 71 | 65  | 58 | 43 | 19 |
| mmu-miR-872-3p    | 57 | 90  | 49 | 34 | 26 |
| mmu-miR-671-3p    | 73 | 70  | 54 | 54 | 38 |
| mmu-miR-181c-3p   | 91 | 63  | 53 | 32 | 25 |
| mmu-miR-340-5p    | 62 | 63  | 83 | 19 | 17 |
| mmu-miR-335-3p    | 60 | 69  | 80 | 19 | 8  |
| mmu-miR-330-5p    | 71 | 67  | 74 | 45 | 33 |
| mmu-miR-21a-5p    | 76 | 76  | 68 | 9  | 23 |
| mmu-miR-1843b-3p  | 67 | 89  | 70 | 71 | 52 |
| mmu-miR-337-5p    | 75 | 85  | 69 | 36 | 23 |
| mmu-miR-330-3p    | 63 | 85  | 81 | 78 | 55 |
| mmu-miR-451a      | 85 | 91  | 55 | 9  | 9  |
| mmu-miR-361-5p    | 81 | 78  | 74 | 41 | 29 |
| mmu-miR-331-3p    | 59 | 79  | 95 | 56 | 50 |
| mmu-miR-425-5p    | 70 | 102 | 64 | 38 | 19 |
| mmu-miR-485-3p    | 65 | 103 | 69 | 75 | 43 |

|                   |     |     |     |     |     |
|-------------------|-----|-----|-----|-----|-----|
| mmu-miR-326-3p    | 78  | 75  | 88  | 77  | 25  |
| mmu-miR-127-5p    | 83  | 83  | 81  | 23  | 29  |
| mmu-miR-320-3p    | 90  | 94  | 73  | 68  | 50  |
| mmu-miR-125b-2-3p | 97  | 77  | 87  | 34  | 26  |
| mmu-miR-423-3p    | 86  | 105 | 72  | 59  | 51  |
| mmu-miR-361-3p    | 100 | 93  | 70  | 58  | 60  |
| mmu-miR-129-1-3p  | 78  | 109 | 77  | 88  | 58  |
| mmu-miR-181d-5p   | 101 | 93  | 74  | 31  | 21  |
| mmu-miR-93-5p     | 85  | 86  | 99  | 25  | 27  |
| mmu-miR-532-5p    | 100 | 95  | 79  | 37  | 27  |
| mmu-miR-1843b-5p  | 114 | 78  | 88  | 50  | 37  |
| mmu-miR-1843a-5p  | 114 | 78  | 92  | 31  | 28  |
| mmu-miR-487b-3p   | 84  | 116 | 88  | 24  | 24  |
| mmu-miR-485-5p    | 96  | 111 | 89  | 96  | 64  |
| mmu-miR-298-5p    | 78  | 137 | 87  | 74  | 38  |
| mmu-miR-351-5p    | 127 | 93  | 82  | 79  | 67  |
| mmu-miR-431-3p    | 106 | 99  | 98  | 79  | 47  |
| mmu-miR-664-3p    | 98  | 123 | 96  | 94  | 72  |
| mmu-miR-25-3p     | 98  | 128 | 94  | 19  | 21  |
| mmu-miR-1291      | 82  | 153 | 92  | 111 | 71  |
| mmu-miR-212-5p    | 114 | 107 | 110 | 72  | 39  |
| mmu-miR-192-5p    | 137 | 114 | 100 | 29  | 34  |
| mmu-miR-132-5p    | 135 | 108 | 118 | 53  | 39  |
| mmu-miR-145a-5p   | 108 | 145 | 111 | 91  | 68  |
| mmu-miR-101a-3p   | 117 | 113 | 138 | 29  | 28  |
| mmu-miR-30e-3p    | 116 | 135 | 120 | 34  | 40  |
| mmu-miR-218-5p    | 132 | 103 | 139 | 35  | 28  |
| mmu-miR-126a-3p   | 121 | 124 | 131 | 27  | 29  |
| mmu-miR-676-3p    | 117 | 147 | 112 | 81  | 68  |
| mmu-miR-30a-3p    | 148 | 144 | 133 | 57  | 40  |
| mmu-miR-667-3p    | 91  | 199 | 136 | 102 | 110 |
| mmu-miR-219a-2-3p | 170 | 135 | 127 | 46  | 45  |
| mmu-miR-128-1-5p  | 201 | 110 | 129 | 137 | 103 |
| mmu-miR-23a-3p    | 163 | 131 | 149 | 70  | 34  |
| mmu-miR-181a-1-3p | 166 | 162 | 116 | 70  | 85  |
| mmu-miR-200a-3p   | 58  | 240 | 148 | 3   | 0   |
| mmu-miR-338-3p    | 119 | 187 | 153 | 42  | 43  |
| mmu-miR-582-3p    | 153 | 153 | 157 | 50  | 42  |
| mmu-miR-369-5p    | 162 | 181 | 121 | 69  | 62  |
| mmu-miR-200b-3p   | 79  | 253 | 136 | 12  | 0   |
| mmu-miR-24-3p     | 189 | 122 | 160 | 71  | 56  |
| mmu-miR-107-3p    | 177 | 164 | 141 | 67  | 49  |
| mmu-miR-126a-5p   | 149 | 168 | 187 | 50  | 51  |
| mmu-miR-26b-5p    | 160 | 189 | 162 | 30  | 34  |
| mmu-miR-668-3p    | 163 | 207 | 164 | 124 | 113 |
| mmu-miR-484       | 139 | 218 | 188 | 129 | 90  |
| mmu-miR-341-3p    | 206 | 152 | 192 | 74  | 57  |
| mmu-miR-212-3p    | 183 | 177 | 192 | 139 | 87  |
| mmu-miR-99a-5p    | 202 | 202 | 150 | 86  | 89  |
| mmu-miR-148a-3p   | 179 | 206 | 185 | 57  | 41  |

|                  |      |      |      |     |     |
|------------------|------|------|------|-----|-----|
| mmu-miR-433-3p   | 180  | 231  | 195  | 185 | 170 |
| mmu-miR-1249-3p  | 200  | 260  | 175  | 186 | 180 |
| mmu-miR-23b-3p   | 231  | 210  | 211  | 112 | 76  |
| mmu-miR-136-3p   | 218  | 232  | 274  | 46  | 45  |
| mmu-miR-429-3p   | 102  | 466  | 234  | 10  | 3   |
| mmu-miR-140-3p   | 291  | 299  | 252  | 179 | 117 |
| mmu-let-7d-3p    | 245  | 335  | 313  | 247 | 151 |
| mmu-miR-92a-3p   | 270  | 356  | 268  | 214 | 146 |
| mmu-miR-409-3p   | 346  | 347  | 286  | 163 | 159 |
| mmu-miR-383-5p   | 431  | 282  | 358  | 176 | 110 |
| mmu-miR-434-5p   | 374  | 357  | 340  | 160 | 131 |
| mmu-miR-30b-5p   | 325  | 424  | 370  | 100 | 80  |
| mmu-miR-129-5p   | 396  | 399  | 434  | 242 | 167 |
| mmu-miR-139-5p   | 386  | 438  | 437  | 289 | 158 |
| mmu-miR-300-3p   | 416  | 465  | 430  | 229 | 156 |
| mmu-miR-100-5p   | 435  | 521  | 380  | 222 | 170 |
| mmu-miR-221-3p   | 521  | 377  | 451  | 161 | 116 |
| mmu-miR-328-3p   | 445  | 518  | 432  | 450 | 346 |
| mmu-miR-342-3p   | 486  | 510  | 418  | 342 | 245 |
| mmu-miR-150-5p   | 401  | 621  | 413  | 338 | 210 |
| mmu-miR-378a-3p  | 495  | 466  | 479  | 233 | 165 |
| mmu-miR-149-5p   | 429  | 581  | 485  | 351 | 249 |
| mmu-miR-744-5p   | 514  | 541  | 492  | 432 | 347 |
| mmu-miR-5121     | 432  | 653  | 496  | 591 | 340 |
| mmu-miR-129-2-3p | 503  | 619  | 538  | 543 | 353 |
| mmu-let-7e-5p    | 648  | 512  | 513  | 264 | 205 |
| mmu-miR-186-5p   | 519  | 636  | 538  | 185 | 151 |
| mmu-miR-3535     | 483  | 705  | 560  | 515 | 331 |
| mmu-let-7i-5p    | 724  | 542  | 603  | 365 | 216 |
| mmu-let-7d-5p    | 854  | 548  | 718  | 367 | 272 |
| mmu-miR-222-3p   | 709  | 773  | 643  | 437 | 369 |
| mmu-miR-103-3p   | 943  | 736  | 725  | 342 | 264 |
| mmu-miR-30e-5p   | 802  | 817  | 796  | 284 | 286 |
| mmu-let-7g-5p    | 979  | 645  | 794  | 403 | 306 |
| mmu-miR-151-5p   | 847  | 887  | 766  | 422 | 324 |
| mmu-miR-411-5p   | 925  | 789  | 902  | 273 | 204 |
| mmu-miR-381-3p   | 929  | 856  | 841  | 340 | 260 |
| mmu-miR-16-5p    | 881  | 1026 | 837  | 273 | 204 |
| mmu-let-7b-5p    | 1199 | 939  | 922  | 771 | 486 |
| mmu-miR-204-5p   | 929  | 1365 | 854  | 417 | 417 |
| mmu-miR-183-5p   | 505  | 1653 | 1111 | 53  | 19  |
| mmu-miR-151-3p   | 957  | 1330 | 1022 | 867 | 705 |
| mmu-miR-124-3p   | 1325 | 1189 | 1082 | 707 | 519 |
| mmu-miR-541-5p   | 1480 | 1027 | 1110 | 406 | 370 |
| mmu-miR-181b-5p  | 1411 | 1145 | 1098 | 515 | 430 |
| mmu-miR-486b-5p  | 1434 | 1398 | 1093 | 789 | 885 |
| mmu-miR-486a-5p  | 1448 | 1329 | 1170 | 795 | 983 |
| mmu-miR-143-3p   | 1376 | 1435 | 1488 | 416 | 328 |
| mmu-miR-138-5p   | 1178 | 1731 | 1683 | 614 | 399 |
| mmu-let-7f-5p    | 1740 | 1396 | 1551 | 533 | 491 |



|                 |       |       |       |       |       |
|-----------------|-------|-------|-------|-------|-------|
| mmu-miR-181c-5p | 2055  | 1543  | 1511  | 815   | 658   |
| mmu-miR-132-3p  | 2368  | 1762  | 1902  | 1638  | 858   |
| mmu-miR-29a-3p  | 1758  | 2418  | 1887  | 849   | 481   |
| mmu-miR-410-3p  | 1992  | 2078  | 2139  | 1240  | 734   |
| mmu-miR-27b-3p  | 2323  | 1882  | 2132  | 718   | 548   |
| mmu-let-7a-5p   | 2855  | 1913  | 2402  | 1123  | 777   |
| mmu-miR-30c-5p  | 2274  | 2870  | 2248  | 992   | 753   |
| mmu-miR-9-5p    | 2489  | 2323  | 2686  | 644   | 540   |
| mmu-miR-92b-3p  | 2363  | 3436  | 2486  | 2569  | 2303  |
| mmu-miR-30a-5p  | 3692  | 2736  | 3270  | 1210  | 991   |
| mmu-let-7c-5p   | 4138  | 2904  | 3480  | 1986  | 1348  |
| mmu-miR-125b-5p | 3727  | 4171  | 3134  | 3294  | 2627  |
| mmu-miR-99b-5p  | 3608  | 4448  | 3894  | 4366  | 3035  |
| mmu-miR-191-5p  | 4412  | 4430  | 3544  | 2681  | 2050  |
| mmu-miR-182-5p  | 2159  | 6187  | 4145  | 185   | 65    |
| mmu-miR-30d-5p  | 6638  | 5480  | 4965  | 3492  | 2712  |
| mmu-miR-125a-5p | 6623  | 8369  | 6225  | 6839  | 5215  |
| mmu-miR-22-3p   | 7828  | 7667  | 7351  | 2884  | 2123  |
| mmu-miR-128-3p  | 7402  | 8562  | 7184  | 3100  | 2203  |
| mmu-miR-434-3p  | 11786 | 10441 | 9679  | 5112  | 4378  |
| mmu-miR-26a-5p  | 11678 | 13614 | 10697 | 4324  | 3183  |
| mmu-miR-127-3p  | 31124 | 34608 | 30933 | 18534 | 12848 |
| mmu-miR-181a-5p | 56753 | 37175 | 39861 | 28017 | 20451 |
